# Supplementary material for: Ultrasensitive single-cell proteomics workflow identifies >1000 protein groups per mammalian cell
Source: Royal Society of Chemistry journal article supplement (doi:10.1039/d0sc03636f), 2020-11-17
Supplement: d0sc03636f1.pdf [file d0sc03636f1.pdf]

## **Ultrasensitive single-cell proteomics workflow identifies >1000 protein groups per mammalian cell**

*Yongzheng Cong,<sup>a</sup> Khatereh Motamedchaboki,<sup>b</sup> Santosh A. Misal,<sup>a</sup> Yiran Liang,<sup>a</sup> Amanda J. Guise,<sup>c</sup> Thy Truong,<sup>a</sup> Romain Huguet,<sup>b</sup> Edward D. Plowey,<sup>c</sup> Ying Zhu,<sup>d</sup> Daniel Lopez-Ferrer,<sup>b</sup> and  
Ryan T. Kelly<sup>a,d\*</sup>*

a. Department of Chemistry and Biochemistry, Brigham Young University, Provo, UT, 84604

b. Thermo Fisher Scientific, San Jose, CA, 95134

c. Biogen Inc, Cambridge, MA, 02142

d. Environmental Molecular Sciences Laboratory, Pacific Northwest National Laboratory, Richland, WA, 99354

## Supporting Information

Table S1. Protein groups identified from 0.5 ng of HeLa digest

| Method               | Protein groups |             |             |         |
|----------------------|----------------|-------------|-------------|---------|
|                      | Replicate 1    | Replicate 2 | Replicate 3 | Average |
| OTOT-HCD 2 FAIMS CVs | 1498           | 1627        | 1633        | 1586    |
| OTIT-CID 2 FAIMS CVs | 1729           | 1844        | 1933        | 1835    |
| OTIT-HCD 2 FAIMS CVs | 2171           | 2009        | 2003        | 2061    |
| OTIT-HCD 3 FAIMS CVs | 1847           | 1937        | 1803        | 1862    |

## Supporting Information

Table S2. Protein groups identified from single cells and blank sample analyzed by LC/MS

|          | Sample | Protein groups |      |      |         | Peptide groups |      |      |         |
|----------|--------|----------------|------|------|---------|----------------|------|------|---------|
|          |        | R1             | R2   | R3   | Average | R1             | R2   | R3   | Average |
| FAIMS    | SH     | 1031           | 1156 | 980  | 1056    | 4064           | 4395 | 3276 | 3912    |
|          | SM     | 972            | 1192 | 1126 | 1097    | 3063           | 3595 | 3232 | 3297    |
|          | SI     | 989            | 1265 | 1322 | 1192    | 2978           | 3842 | 4195 | 3672    |
|          | Blank  | 149            | 200  | 224  | 191     | 320            | 443  | 524  | 429     |
| No FAIMS | SH     | 532            | 430  | 418  | 460     | 2460           | 1814 | 1545 | 1940    |

Note: SH: single HeLa cell, SM: single motor neuron, SI: single interneuron; R1,2,3: replicates 1,2,3;  
Blank: HeLa cell supernatant

Supporting Information

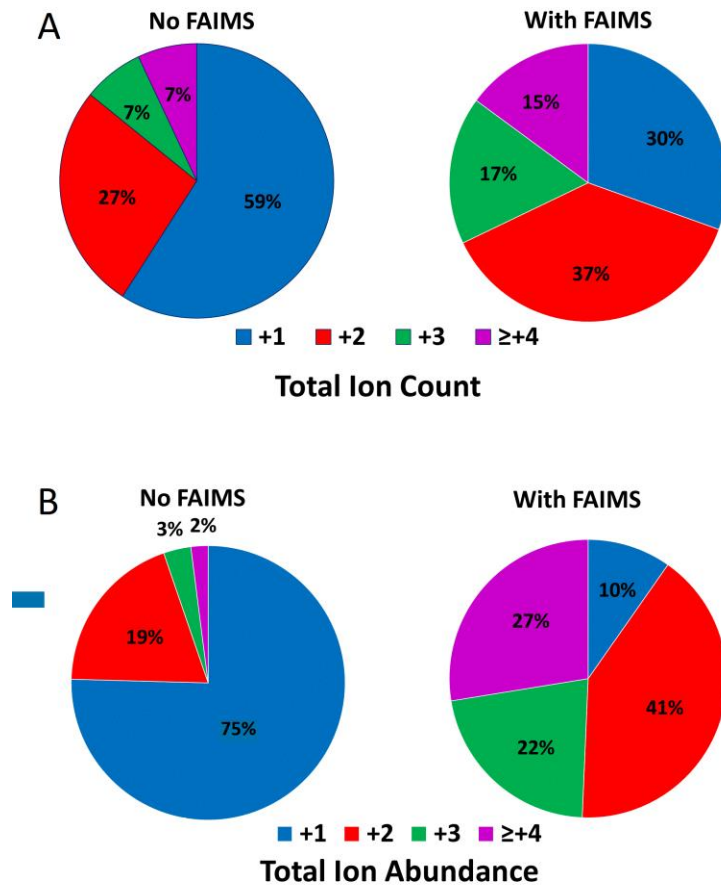

Figure S1 The percentage of detected charged ions from single HeLa cells with/without FAIMS Pro interface incorporated . A) Percentage change of charged ions count (species). B) Percentage change of charged ions abundance.

Supporting Information

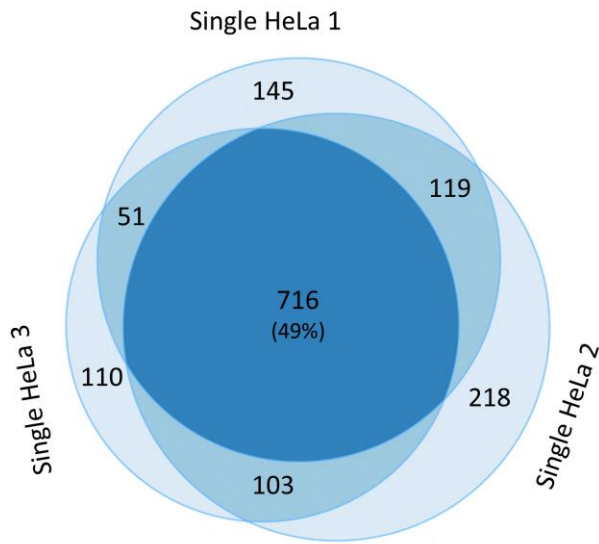

Figure S2 Venn diagram indicating overlap of identified protein groups among three replicate analyses of single HeLa cells.



## Supporting Information

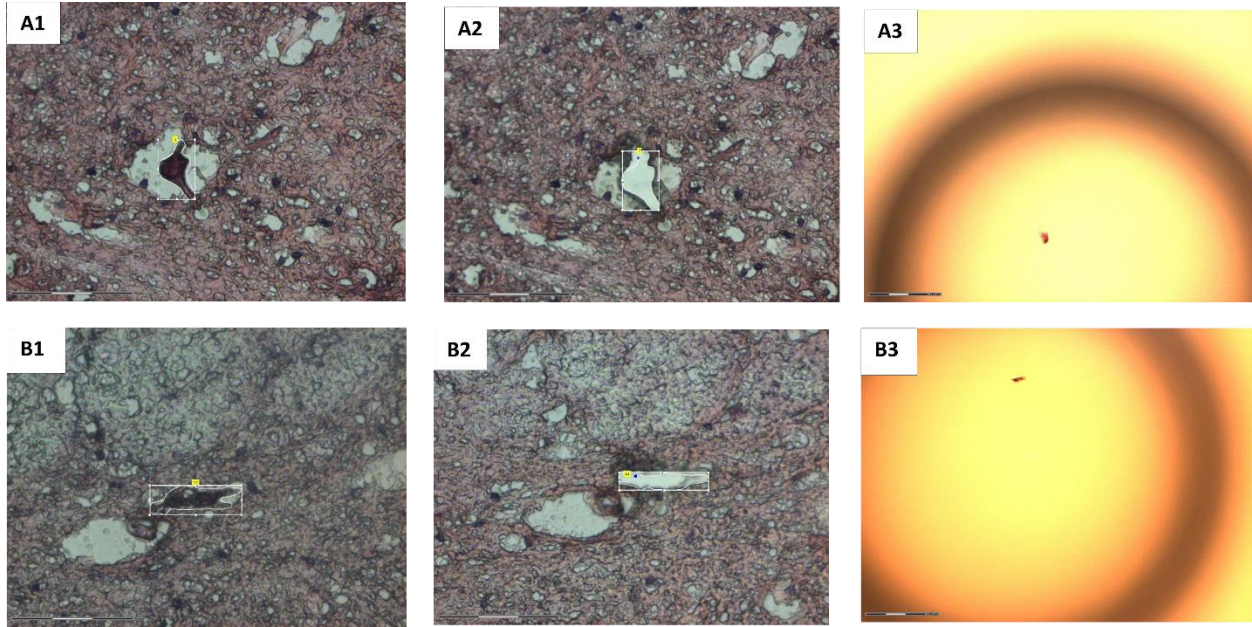

Figure S4. Representative images showing laser capture microdissection of single motor neurons and interneurons. A1 and A2 show H&E stained tissue before and after microdissection of a motor neuron. A3 shows the same motor neuron transferred to a nanowell. B1–B3 show corresponding images for an interneuron.
